# Supplementary material for: Racial Comparisons of Diabetes Care and Intermediate Outcomes in a Patient-Centered Medical Home
Source: PubMed Central journal article supplement — Diabetes Care. 2014 Mar 8;37(4):993–1001. doi: 10.2337/dc13-1332 (PMC3964485; doi:10.2337/dc13-1332), 2014-03-08

SUPPLEMENTARY DATA

**Supplementary Table 1.** Factors Independently Associated with Diabetes Processes of Care.

| Patient Characteristic                                                                | Laboratory Testing |                  | Examination      |                  | Vaccination      |                  |
|---------------------------------------------------------------------------------------|--------------------|------------------|------------------|------------------|------------------|------------------|
|                                                                                       | A1C                | LDL              | Foot             | Retinal          | Influenza        | Pneumococcal     |
|                                                                                       | OR (95% CI)        | OR (95% CI)      | OR (95% CI)      | OR (95% CI)      | OR (95% CI)      | OR (95% CI)      |
| Black race ( <i>ref</i> = non-Hispanic white)                                         | 0.57 (0.34-0.95)   | 0.94 (0.67-1.31) | 1.19 (0.86-1.64) | 1.00 (0.77-1.32) | 0.75 (0.57-0.99) | 0.63 (0.35-1.15) |
| Age ( <i>ref</i> = younger age)                                                       | 1.02 (1.001-1.04)  | 1.03 (1.02-1.04) | 1.03 (1.02-1.04) | 1.02 (1.01-1.03) | 1.03 (1.02-1.05) | 1.02 (1.00-1.05) |
| Female sex ( <i>ref</i> = male)                                                       | 1.10 (0.69-1.75)   | 1.02 (0.74-1.38) | 0.86 (0.64-1.15) | 1.09 (0.85-1.40) | 0.93 (0.72-1.20) | 0.75 (0.43-1.31) |
| Marital status ( <i>ref</i> = single)                                                 |                    |                  |                  |                  |                  |                  |
| Committed relationship or married                                                     | 1.03 (0.57-1.86)   | 0.73 (0.50-1.07) | 0.86 (0.60-1.23) | 0.98 (0.72-1.32) | 1.06 (0.78-1.44) | 0.73 (0.38-1.41) |
| Separated, divorced or widowed                                                        | 0.61 (0.32-1.16)   | 0.91 (0.60-1.39) | 0.59 (0.40-0.87) | 0.87 (0.63-1.22) | 0.92 (0.65-1.29) | 1.37 (0.62-3.04) |
| Educational level ( <i>ref</i> < high school)                                         |                    |                  |                  |                  |                  |                  |
| High school                                                                           | 0.55 (0.15-2.08)   | 0.92 (0.48-1.78) | 1.35 (0.72-2.52) | 0.78 (0.43-1.40) | 1.00 (0.55-1.81) | 0.56 (0.12-2.51) |
| Some college                                                                          | 0.53 (0.14-2.02)   | 1.39 (0.71-2.72) | 1.77 (0.94-3.35) | 0.87 (0.48-1.59) | 0.87 (0.47-1.60) | 1.09 (0.23-5.27) |
| Graduate degree                                                                       | 0.46 (0.11-1.91)   | 1.48 (0.71-3.10) | 1.47 (0.74-2.93) | 0.95 (0.51-1.80) | 0.79 (0.41-1.50) | 0.61 (0.11-3.34) |
| Type of medical insurance ( <i>ref</i> = Medicaid, financial assistance or uninsured) |                    |                  |                  |                  |                  |                  |
| Medicare                                                                              | 1.12 (0.54-2.31)   | 0.86 (0.54-1.37) | 1.33 (0.85-2.10) | 1.49 (1.01-2.19) | 0.87 (0.59-1.30) | 0.79 (0.35-1.75) |
| Commercial                                                                            | 1.53 (0.80-2.92)   | 1.51 (0.99-2.30) | 1.71 (1.14-2.57) | 1.98 (1.41-2.79) | 1.37 (0.97-1.94) | 1.58 (0.76-3.28) |
| Body mass index* ( <i>ref</i> ≤24.9 kg/m <sup>2</sup> )                               |                    |                  |                  |                  |                  |                  |
| 25-29.9 kg/m <sup>2</sup>                                                             | 0.67 (0.33-1.35)   | 1.73 (1.07-2.81) | 0.80 (0.50-1.28) | 0.92 (0.62-1.38) | 1.07 (0.71-1.61) | 1.46 (0.58-3.65) |
| ≥30 kg/m <sup>2</sup>                                                                 | 1.11 (0.54-2.31)   | 1.49 (0.97-2.29) | 0.86 (0.55-1.32) | 0.92 (0.64-1.32) | 1.06 (0.73-1.53) | 1.11 (0.49-2.49) |
| Total modified Charlson comorbidities ( <i>ref</i> = 0)                               |                    |                  |                  |                  |                  |                  |
| 1-2                                                                                   | 0.69 (0.42-1.15)   | 0.72 (0.52-1.00) | 0.73 (0.54-0.99) | 1.00 (0.77-1.30) | 1.13 (0.87-1.49) | 1.77 (0.99-3.17) |
| ≥3                                                                                    | 0.60 (0.30-1.23)   | 0.82 (0.52-1.30) | 0.69 (0.45-1.06) | 0.92 (0.64-1.32) | 1.39 (0.95-2.05) | 3.59 (1.29-9.96) |
| Total diabetes complications <sup>†</sup> ( <i>ref</i> = 0)                           |                    |                  |                  |                  |                  |                  |
| ≥1                                                                                    | 5.81 (2.67-12.63)  | 1.16 (0.83-1.63) | 1.70 (1.22-2.38) | 1.66 (1.26-2.19) | 1.03 (0.78-1.36) | 0.87 (0.48-1.58) |
| Level of social support ( <i>ref</i> ≥2)                                              |                    |                  |                  |                  |                  |                  |
| 0-1                                                                                   | 1.14 (0.60-2.15)   | 1.00 (0.71-1.47) | 0.74 (0.53-1.04) | 1.06 (0.80-1.41) | 1.01 (0.74-1.37) | 1.76 (0.80-3.89) |
| Median mental health composite score                                                  | 1.04 (1.01-1.07)   | 1.01 (0.98-1.02) | 1.01 (0.99-1.03) | 1.01 (0.99-1.02) | 0.99 (0.97-1.00) | 0.97 (0.94-1.00) |
| Median physical health composite score                                                | 0.97 (0.94-1.00)   | 1.00 (0.98-1.03) | 0.99 (0.97-1.01) | 1.00 (0.99-1.02) | 1.01 (0.99-1.02) | 1.03 (0.99-1.07) |
| Measure of Treatment Intensity                                                        |                    |                  |                  |                  |                  |                  |
| Attending physician is primary care provider                                          | 0.60 (0.30-1.21)   | 1.07 (0.67-1.70) | 0.54 (0.30-0.98) | 0.98 (0.66-1.46) | 1.20 (0.82-1.77) | 0.88 (0.38-2.02) |
| Total multidisciplinary visits <sup>§</sup>                                           | 4.26 (2.09-8.69)   | 1.46 (1.18-1.81) | 1.45 (1.19-1.77) | 1.19 (1.05-1.35) | 1.09 (0.96-1.24) | 0.96 (0.78-1.18) |

## SUPPLEMENTARY DATA

|                                                                              |                   |                  |                  |                  |                  |                  |
|------------------------------------------------------------------------------|-------------------|------------------|------------------|------------------|------------------|------------------|
| Total number of prescribed classes of diabetes medications ( <i>ref</i> = 0) |                   |                  |                  |                  |                  |                  |
| 1                                                                            | 5.67 (3.42-9.41)  | 2.46 (1.77-3.42) | 2.27 (1.67-3.09) | 1.80 (1.36-2.37) | 1.81 (1.37-2.40) | 1.29 (0.71-2.37) |
| $\geq 2$                                                                     | 5.47 (2.74-10.94) | 2.15 (1.46-3.18) | 3.26 (2.23-4.77) | 1.76 (1.29-2.41) | 1.96 (1.42-2.71) | 1.54 (0.76-3.14) |
| Measure of Continuity of Care                                                |                   |                  |                  |                  |                  |                  |
| Proportion of total physician visits seen by primary care provider           | 3.54 (1.64-7.65)  | 1.78 (1.03-3.06) | 1.60 (0.91-2.82) | 1.18 (0.73-1.88) | 1.44 (0.90-2.30) | 0.38 (0.11-1.29) |
| Total missed physician appointments                                          | 1.12 (0.97-1.31)  | 1.01 (0.93-1.10) | 0.99 (0.91-1.07) | 0.92 (0.86-0.98) | 1.07 (1.01-1.15) | 0.97 (0.86-1.10) |

A1C = glycated hemoglobin; LDL = low-density lipoprotein cholesterol; OR = odds ratio; CI = confidence interval; ref = reference;

kg = kilograms; m = meters

\* Body mass index = weight (kg) / height (m)<sup>2</sup>

† Diabetes complications include nephropathy, retinopathy, neuropathy and peripheral vascular disease

§ Multidisciplinary visits include visits to a diabetes nurse educator or pharmacist

SUPPLEMENTARY DATA

**Supplementary Table 2.** Factors Independently Associated with Diabetes Intermediate Outcomes.

|                                                                                       | LDL<100mg/dL     | BP<140/90mmHg    | A1C<7.0% (<53 mmol/mol) | A1C>9.0% (>75 mmol/mol) |
|---------------------------------------------------------------------------------------|------------------|------------------|-------------------------|-------------------------|
| Black race ( <i>ref</i> = non-Hispanic white)                                         | 0.74 (0.55-0.99) | 0.64 (0.49-0.84) | 0.92 (0.70-1.20)        | 1.33 (0.93-1.90)        |
| Age ( <i>ref</i> = younger age)                                                       | 1.03 (1.01-1.04) | 0.99 (0.98-1.00) | 1.02 (1.01-1.03)        | 0.97 (0.95-0.98)        |
| Female sex ( <i>ref</i> = male)                                                       | 0.62 (0.48-0.81) | 0.93 (0.72-1.21) | 1.00 (0.79-1.27)        | 0.99 (0.71-1.40)        |
| Marital status ( <i>ref</i> = single)                                                 |                  |                  |                         |                         |
| Committed relationship or married                                                     | 0.89 (0.65-1.22) | 0.95 (0.69-1.30) | 0.98 (0.73-1.32)        | 0.98 (0.65-1.47)        |
| Separated, divorced or widowed                                                        | 0.80 (0.56-1.13) | 0.75 (0.54-1.04) | 0.89 (0.65-1.23)        | 1.10 (0.70-1.73)        |
| Educational level ( <i>ref</i> < high school)                                         |                  |                  |                         |                         |
| High school                                                                           | 0.98 (0.53-1.80) | 0.75 (0.42-1.32) | 0.83 (0.48-1.41)        | 1.17 (0.52-2.62)        |
| Some college                                                                          | 0.94 (0.49-1.80) | 0.70 (0.39-1.28) | 0.93 (0.53-1.60)        | 1.34 (0.57-3.11)        |
| Graduate degree                                                                       | 1.20 (0.59-2.24) | 0.89 (0.47-1.71) | 1.04 (0.58-1.86)        | 1.05 (0.42-2.63)        |
| Type of medical insurance ( <i>ref</i> = Medicaid, financial assistance or uninsured) |                  |                  |                         |                         |
| Medicare                                                                              | 1.03 (0.68-1.55) | 1.02 (0.68-1.53) | 0.96 (0.64-1.42)        | 1.39 (0.81-2.38)        |
| Commercial                                                                            | 1.11 (0.77-1.59) | 1.01 (0.71-1.44) | 0.99 (0.70-1.41)        | 1.13 (0.71-1.79)        |
| Body mass index* ( <i>ref</i> ≤24.9 kg/m <sup>2</sup> )                               |                  |                  |                         |                         |
| 25-29.9 kg/m <sup>2</sup>                                                             | 0.61 (0.39-0.95) | 0.88 (0.58-1.33) | 1.11 (0.75-1.65)        | 0.74 (0.42-1.31)        |
| ≥30 kg/m <sup>2</sup>                                                                 | 0.65 (0.45-0.94) | 0.78 (0.53-1.14) | 0.94 (0.66-1.33)        | 0.87 (0.52-1.43)        |
| Total modified Charlson comorbidities ( <i>ref</i> = 0)                               |                  |                  |                         |                         |
| 1-2                                                                                   | 1.08 (0.83-1.42) | 0.86 (0.65-1.12) | 1.24 (0.94-1.63)        | 0.62 (0.42-0.91)        |
| ≥3                                                                                    | 1.29 (0.88-1.89) | 0.95 (0.66-1.37) | 1.47 (1.03-2.12)        | 0.59 (0.35-0.99)        |
| Total diabetes complications <sup>†</sup> ( <i>ref</i> = 0)                           |                  |                  |                         |                         |
| ≥1                                                                                    | 1.10 (0.81-1.54) | 0.82 (0.63-1.08) | 0.67 (0.51-0.87)        | 1.46 (1.03-2.07)        |
| Level of social support ( <i>ref</i> ≥2)                                              |                  |                  |                         |                         |
| 0-1                                                                                   | 0.91 (0.66-1.26) | 0.97 (0.71-1.34) | 1.29 (0.96-1.73)        | 0.97 (0.63-1.48)        |
| Median mental health composite score                                                  | 1.01 (1.00-1.03) | 0.99 (0.98-1.01) | 1.02 (1.001-1.03)       | 0.99 (0.97-1.01)        |
| Median physical health composite score                                                | 1.00 (0.98-1.01) | 1.01 (0.99-1.03) | 0.98 (0.97-0.999)       | 1.00 (0.98-1.02)        |
| Measure of Treatment Intensity                                                        |                  |                  |                         |                         |
| Attending physician is primary care                                                   | 1.01 (0.64-1.59) | 0.96 (0.65-1.42) | 1.18 (0.81-1.72)        | 0.60 (0.39-0.95)        |

SUPPLEMENTARY DATA

|                                                                              |                  |                  |                  |                  |
|------------------------------------------------------------------------------|------------------|------------------|------------------|------------------|
| provider                                                                     |                  |                  |                  |                  |
| Total multidisciplinary visits <sup>§</sup>                                  | 1.11 (0.98-1.25) | 1.00 (0.90-1.11) | 0.68 (0.59-0.78) | 1.37 (1.20-1.57) |
| Total number of prescribed classes of diabetes medications ( <i>ref</i> = 0) |                  |                  |                  |                  |
| 1                                                                            | 1.46 (1.04-2.05) | 1.44 (1.08-1.93) | 0.69 (0.52-0.92) | 1.20 (0.73-1.96) |
| ≥2                                                                           | 1.69 (1.18-2.41) | 1.24 (0.90-1.72) | 0.38 (0.27-0.52) | 2.20 (1.34-3.61) |
| Measure of Continuity of Care                                                |                  |                  |                  |                  |
| Proportion of total physician visits seen by primary care provider           | 1.04 (0.59-1.83) | 0.89 (0.55-1.46) | 0.79 (0.49-1.28) | 1.31 (0.69-2.51) |
| Total missed physician appointments                                          | 0.95 (0.88-1.01) | 0.97 (0.91-1.03) | 1.03 (0.97-1.11) | 1.08 (1.00-1.17) |

LDL = low-density lipoprotein cholesterol; BP = blood pressure; A1C = glycated hemoglobin; OR = odds ratio;

CI = confidence interval; ref = reference; kg = kilograms; m = meters

\* Body mass index = weight (kg) / height (m)<sup>2</sup>

† Diabetes complications include nephropathy, retinopathy, neuropathy and peripheral vascular disease

§ Multidisciplinary visits include visits to a diabetes nurse educator or pharmacist

SUPPLEMENTARY DATA

**Supplementary Figure 1.** Identification of the study cohort PCMH = Patient-Centered Medical Home.

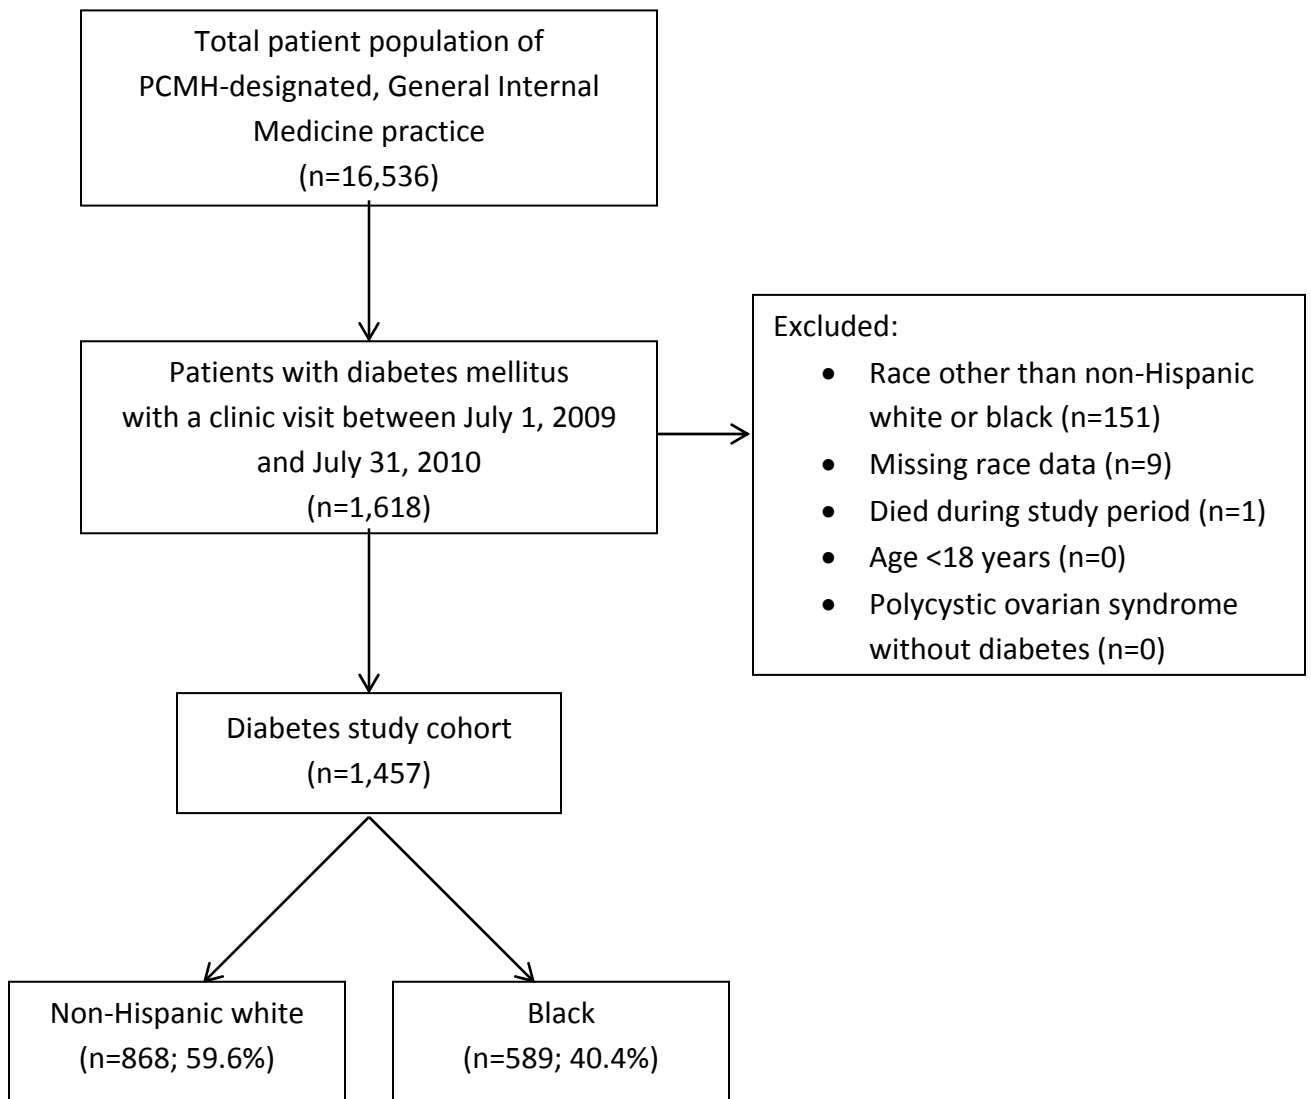

SUPPLEMENTARY DATA

**Supplementary Figure 2.** Sensitivity Analysis of Patients with Attending Providers Adjusted odds ratios for black patients represent the likelihood of receiving a process of care or achieving an intermediate outcome of diabetes care, compared to non-Hispanic white patients. Black patients were less likely to have an LDL <100mg/dL and BP <140/90mmHg. Model covariates include: age; gender; marital status; education; insurance type; social support; mental and physical health composite scores; BMI; total number of diabetes complications; modified Charlson comorbidity index; treatment intensity (excluding provider type) and clinical care continuity. A1C = glycated hemoglobin; LDL = low-density lipoprotein cholesterol; BP = blood pressure; CI =confidence interval

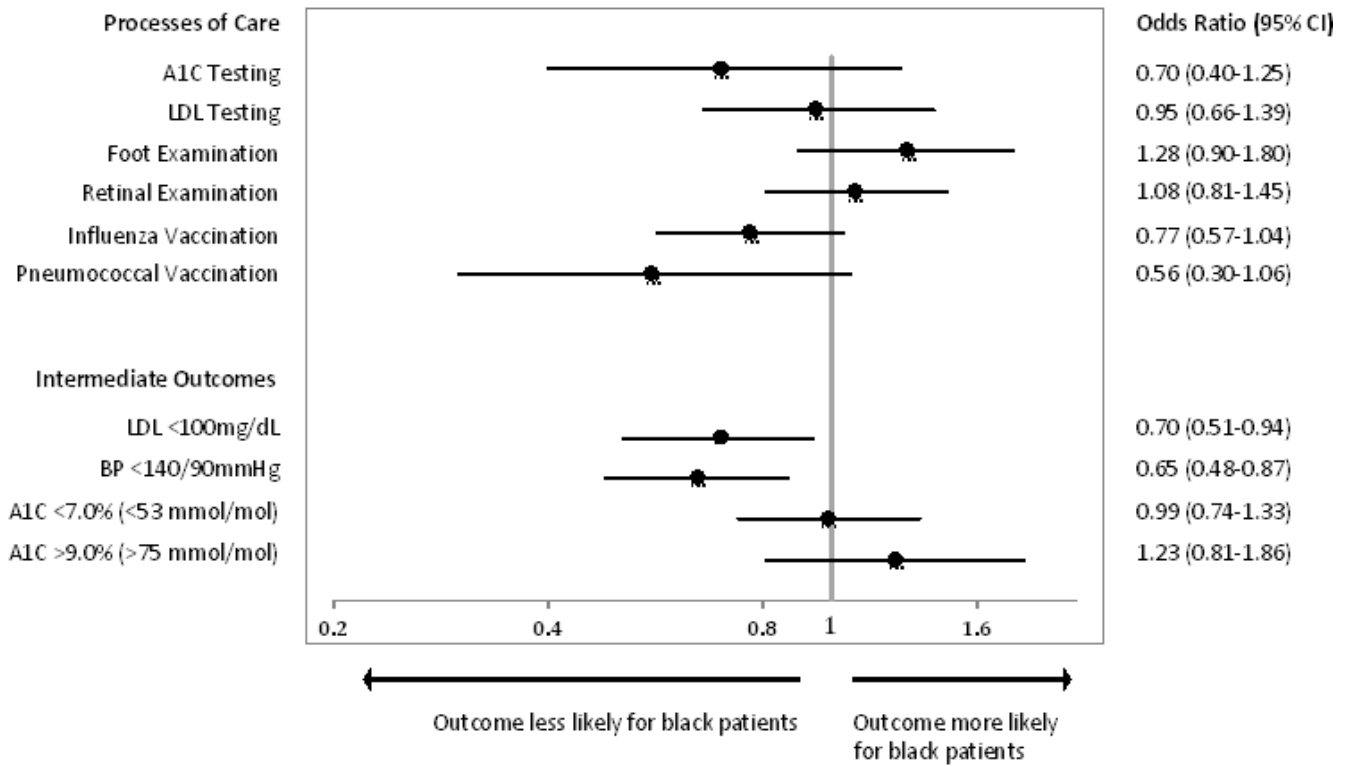

Supplement: supp_dc13-1332v131332_DC131332SupplementaryData.pdf [file supp_dc13-1332v131332_DC131332SupplementaryData.pdf]
